# Supplementary material for: Public Health and Climate Benefits and Trade‐Offs of U.S. Vehicle Electrification
Source: PubMed Central journal article supplement (PMC7567144; doi:10.1029/2020gh000275), 2020-10-01
Supplement: GH2-4-e2020GH000275-s001.pdf [file GH2-4-e2020GH000275-s001.pdf]

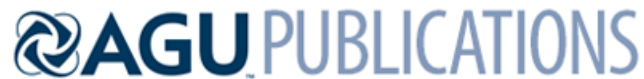

*GeoHealth*

Supporting Information for

**Public Health and Climate Benefits and Tradeoffs of U.S. Vehicle Electrification**

D. R. Peters<sup>1,2</sup>, J. L. Schnell<sup>3,4</sup>, P. L. Kinney<sup>5</sup>, V. Naik<sup>6</sup>, & D. E. Horton<sup>3</sup>

<sup>1</sup>Program in Environmental Sciences, Northwestern University

<sup>2</sup>Environmental Defense Fund, Austin, TX

<sup>3</sup>Department of Earth and Planetary Sciences and Institute for Sustainability and Energy at Northwestern University

<sup>4</sup>Cooperative Institute for Research in Environmental Sciences at the University of Colorado Boulder NOAA/Global Systems Laboratory, Boulder, Colorado, USA

<sup>5</sup>Department of Environmental Health, Boston University School of Public Health

<sup>6</sup>NOAA Geophysical Fluid Dynamics Laboratory, Princeton, NJ

**Contents of this file**

Figures S1 to S3

Table S1

**Additional Supporting Information (Files uploaded separately)**

Captions for Tables S2 to S5

**Introduction**

The supporting information contains three figures, which expand on the main text figures by displaying health impact co-benefit results on a per-capita scale. Additionally, the supporting information includes five tables which contain the calculated state-level CO<sub>2</sub> emissions changes, the BenMAP-CE health impact function parameters, and the BenMAP-CE health impact function results aggregated nationally and by U.S. state and region.

## State-Level Health Impacts

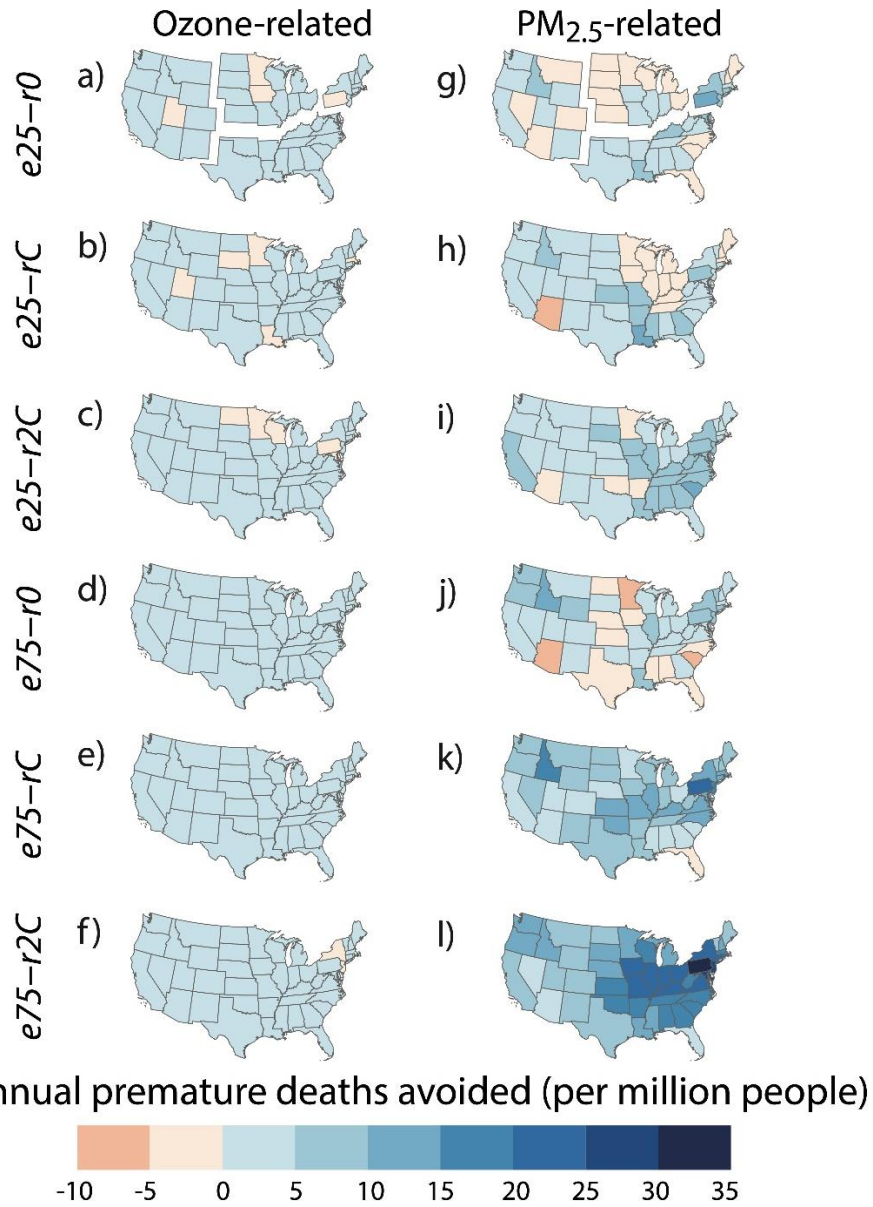

**Figure S1.** Population normalized annual premature deaths avoided by state. EV adoption scenario-driven changes in air pollutants – (a-f) O<sub>3</sub> (Bell et al., 2004) and (g-l) PM<sub>2.5</sub>. (Krewski et al., 2009) – drive changes in annual premature mortality incidence. Data is normalized by state population. Negative numbers signify increases in premature mortality. Panels a and g are subdivided into U.S. Census regions; Midwest, West, Northeast, and South (U.S. Census Bureau, 2018).

## Normalized Grid Cell Health Impacts

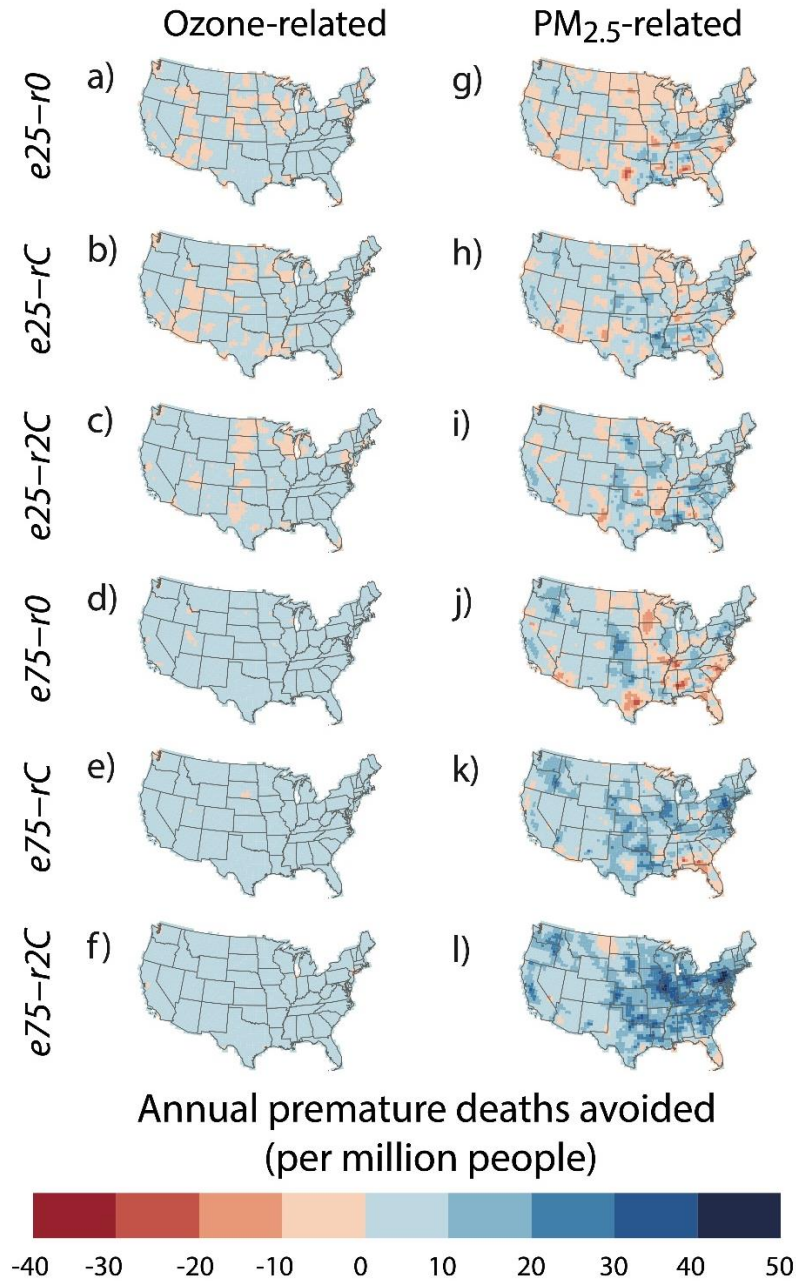

**Figure S2.** Population normalized annual premature deaths avoided by model grid cell. EV adoption scenario-driven changes in air pollutants – (a-f) O<sub>3</sub> (Bell et al., 2004) and (g-l) PM<sub>2.5</sub>. (Krewski et al., 2009) – drive changes in annual premature mortality incidence. Data is normalized by grid cell population. Negative numbers signify increases in premature mortality.

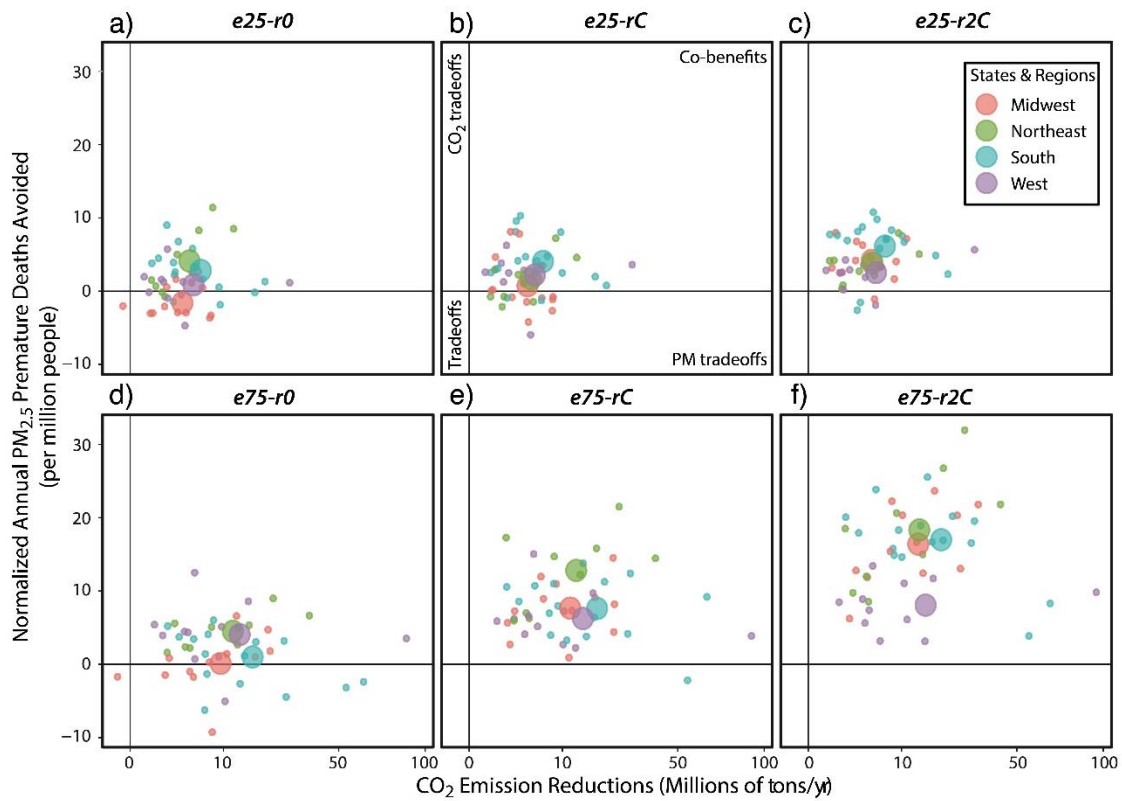

**Figure S3.** Population normalized national, regional, and state co-benefits. Avoided premature mortality and CO<sub>2</sub> reduction co-benefits under six vehicle electrification scenarios. Climate and PM<sub>2.5</sub> health co-benefits (Krewski et al., 2009) for individual states (smaller circles) and regional averages (larger circles) normalized by population.

| Health Impact Function (HIF) | Pollutant                  | Location            | Age Group | Health Endpoint                       | Concentration-response coefficient ( $\beta$ ) | $\beta$ Standard Error | Form       |
|------------------------------|----------------------------|---------------------|-----------|---------------------------------------|------------------------------------------------|------------------------|------------|
| <i>Krewski et al.</i>        | PM <sub>2.5</sub> (Annual) | 116 U.S. Cities     | 30-99     | All-Cause Mortality (Long-Term)       | 0.005827                                       | 0.000963               | Log-linear |
| <i>Laden et al.</i>          | PM <sub>2.5</sub> (Annual) | 6 Cities            | 25-99     | All-Cause Mortality (Long-Term)       | 0.014842                                       | 0.004170               | Log-linear |
| <i>Bell et al.</i>           | Ozone (MDA8)               | 95 U.S. Cities      | 0-99      | Non-Accidental Mortality (Short-Term) | 0.0002613                                      | 0.000089               | Log-linear |
| <i>Ito et al.</i>            | Ozone (MDA8)               | 7 U.S. Cities       | 0-99      | Non-Accidental Mortality (Short-Term) | 0.000532                                       | 0.000088               | Log-linear |
| <i>Jerrett et al.</i>        | Ozone (Annual)             | 86 U.S. Urban Areas | 30-99     | Respiratory Mortality (Long-Term)     | 0.004471                                       | 0.001510               | Log-linear |

**Table S1.** Source of health impact functions (HIFs) and underlying characteristics (US EPA, 2019b).

Tables S2 – S5 are provided as .csv files.

**Table S2.** State-level changes in CO<sub>2</sub> emissions (10<sup>6</sup> tons per year) for EV adoption-energy generation scenarios.

**Table S3.** National health impact data. Column 1: scenario (1 = *e25r0*; 2 = *e25rC*; 3 = *e25r2C*; 4 = *e75r0*; 5 = *e75rC*; 6 = *e75r2C*). Column 2: O<sub>3</sub> or PM<sub>2.5</sub> pollutant. Column 3: HIF Author (see supplemental Table 1 for more details). Column 4, 5, & 6: 50P, 2.5P, and 97.5P estimates of avoided mortality, respectively.

**Table S4.** Regional health impacts data. Column 1: scenario (1 = *e25r0*; 2 = *e25rC*; 3 = *e25r2C*; 4 = *e75r0*; 5 = *e75rC*; 6 = *e75r2C*). Column 2: O<sub>3</sub> or PM<sub>2.5</sub> pollutant. Column 3: HIF Author (see supplemental Table 1 for more details). Columns 4, 5, & 6: 50P, 2.5P, and 97.5P estimates of avoided mortality, respectively.

**Table S5.** State health impact data. Column 1: state. Column 2: scenario (1 = *e25r0*; 2 = *e25rC*; 3 = *e25r2C*; 4 = *e75r0*; 5 = *e75rC*; 6 = *e75r2C*). Column 3: HIF Author (see supplemental Table 1 for more details). Column 4: state population. Columns 5, 6, & 7: 50P, 2.5P, and 97.5P estimates of avoided mortality, respectively. Column 8: percent of baseline; HIF 50P estimate of annual avoided mortality normalized by baseline (*BASE*) incidence rates. Column 9: region of U.S. based on Census Bureau Classification (2018). Column 10: O<sub>3</sub> or PM<sub>2.5</sub> pollutant.
